# Supplementary material for: Damaged Myofiber-Derived Metabolic Enzymes Act as Activators of Muscle Satellite Cells
Source: PubMed Central journal article supplement — Stem Cell Reports. 2020 Sep 3;15(4):926–40. doi: 10.1016/j.stemcr.2020.08.002 (PMC7561495; doi:10.1016/j.stemcr.2020.08.002), 2020-09-03
Supplement: mmc1.pdf [file mmc1.pdf]

**Stem Cell Reports, Volume 15**

**Supplemental Information**

**Damaged Myofiber-Derived Metabolic Enzymes Act as Activators of  
Muscle Satellite Cells**

**Yoshifumi Tsuchiya, Yasuo Kitajima, Hiroshi Masumoto, and Yusuke Ono**

A

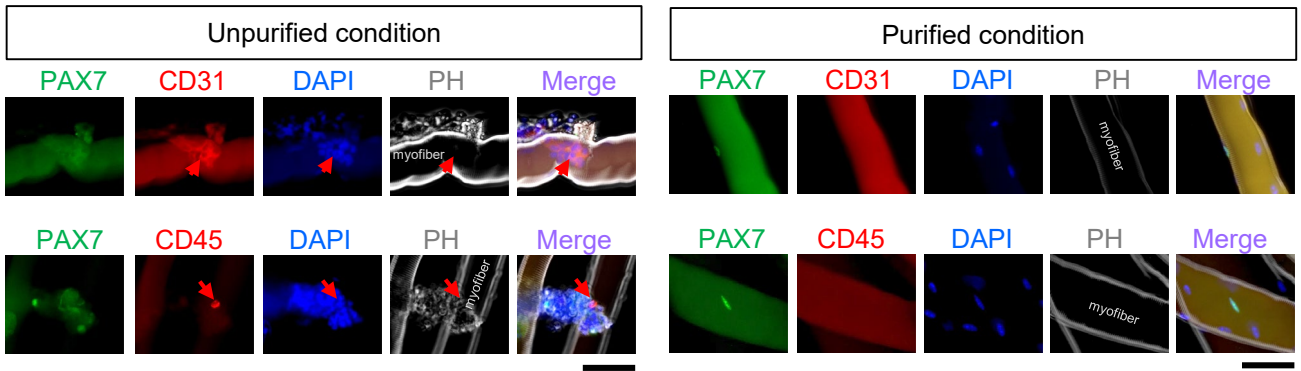

B

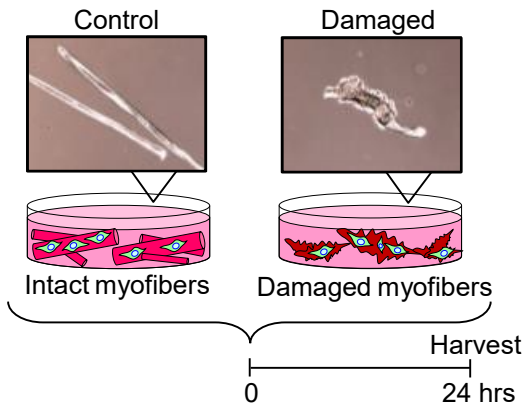

C

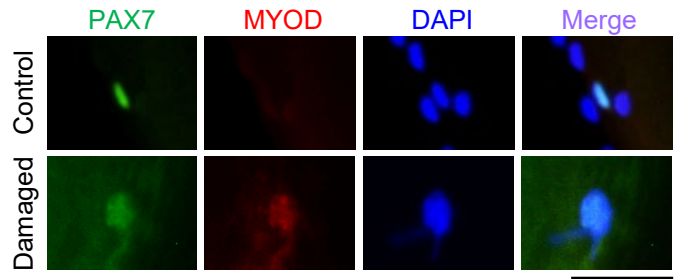

D

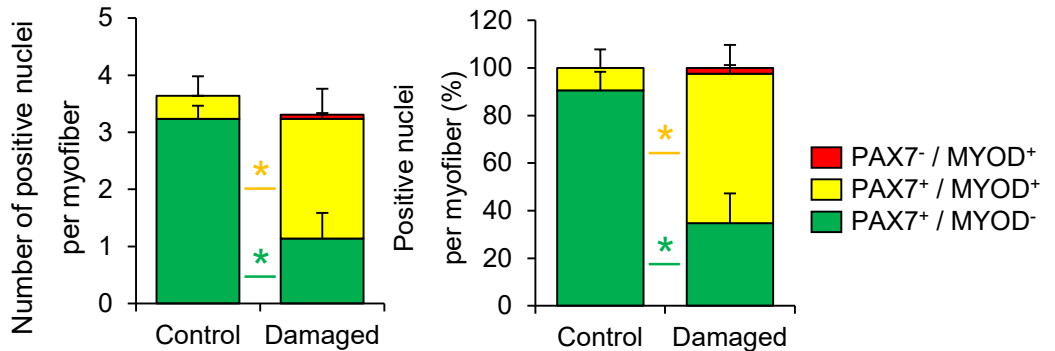

**Figure S1. Satellite cell culture conditions**

(A) Myofibers associated with interstitial cells were visible under the light microscope and avoidable in our culture model. In the unpurified condition, interstitial cells attached myofibers were visualized by immunostaining for CD31 and CD45, whereas these cells were not observed in the purified condition. Scale bars, 50  $\mu$ m.

(B-D) To test whether intact myofibers themselves were responded to DMDFs and then indirectly stimulated their associated satellite cells, satellite cells associated with damaged (shrunken) myofibers were cultured in DMEM for 72 hours (B) and then immunostained for PAX7 and MYOD (C) (quantified in (D)). Isolated myofibers were mechanically damaged with a Pasteur pipette. Scale bars, 25  $\mu$ m. \*P < 0.05. Values are means  $\pm$  SE (n=4 in each condition).

**Figure S2 (Related to Figure 5)**

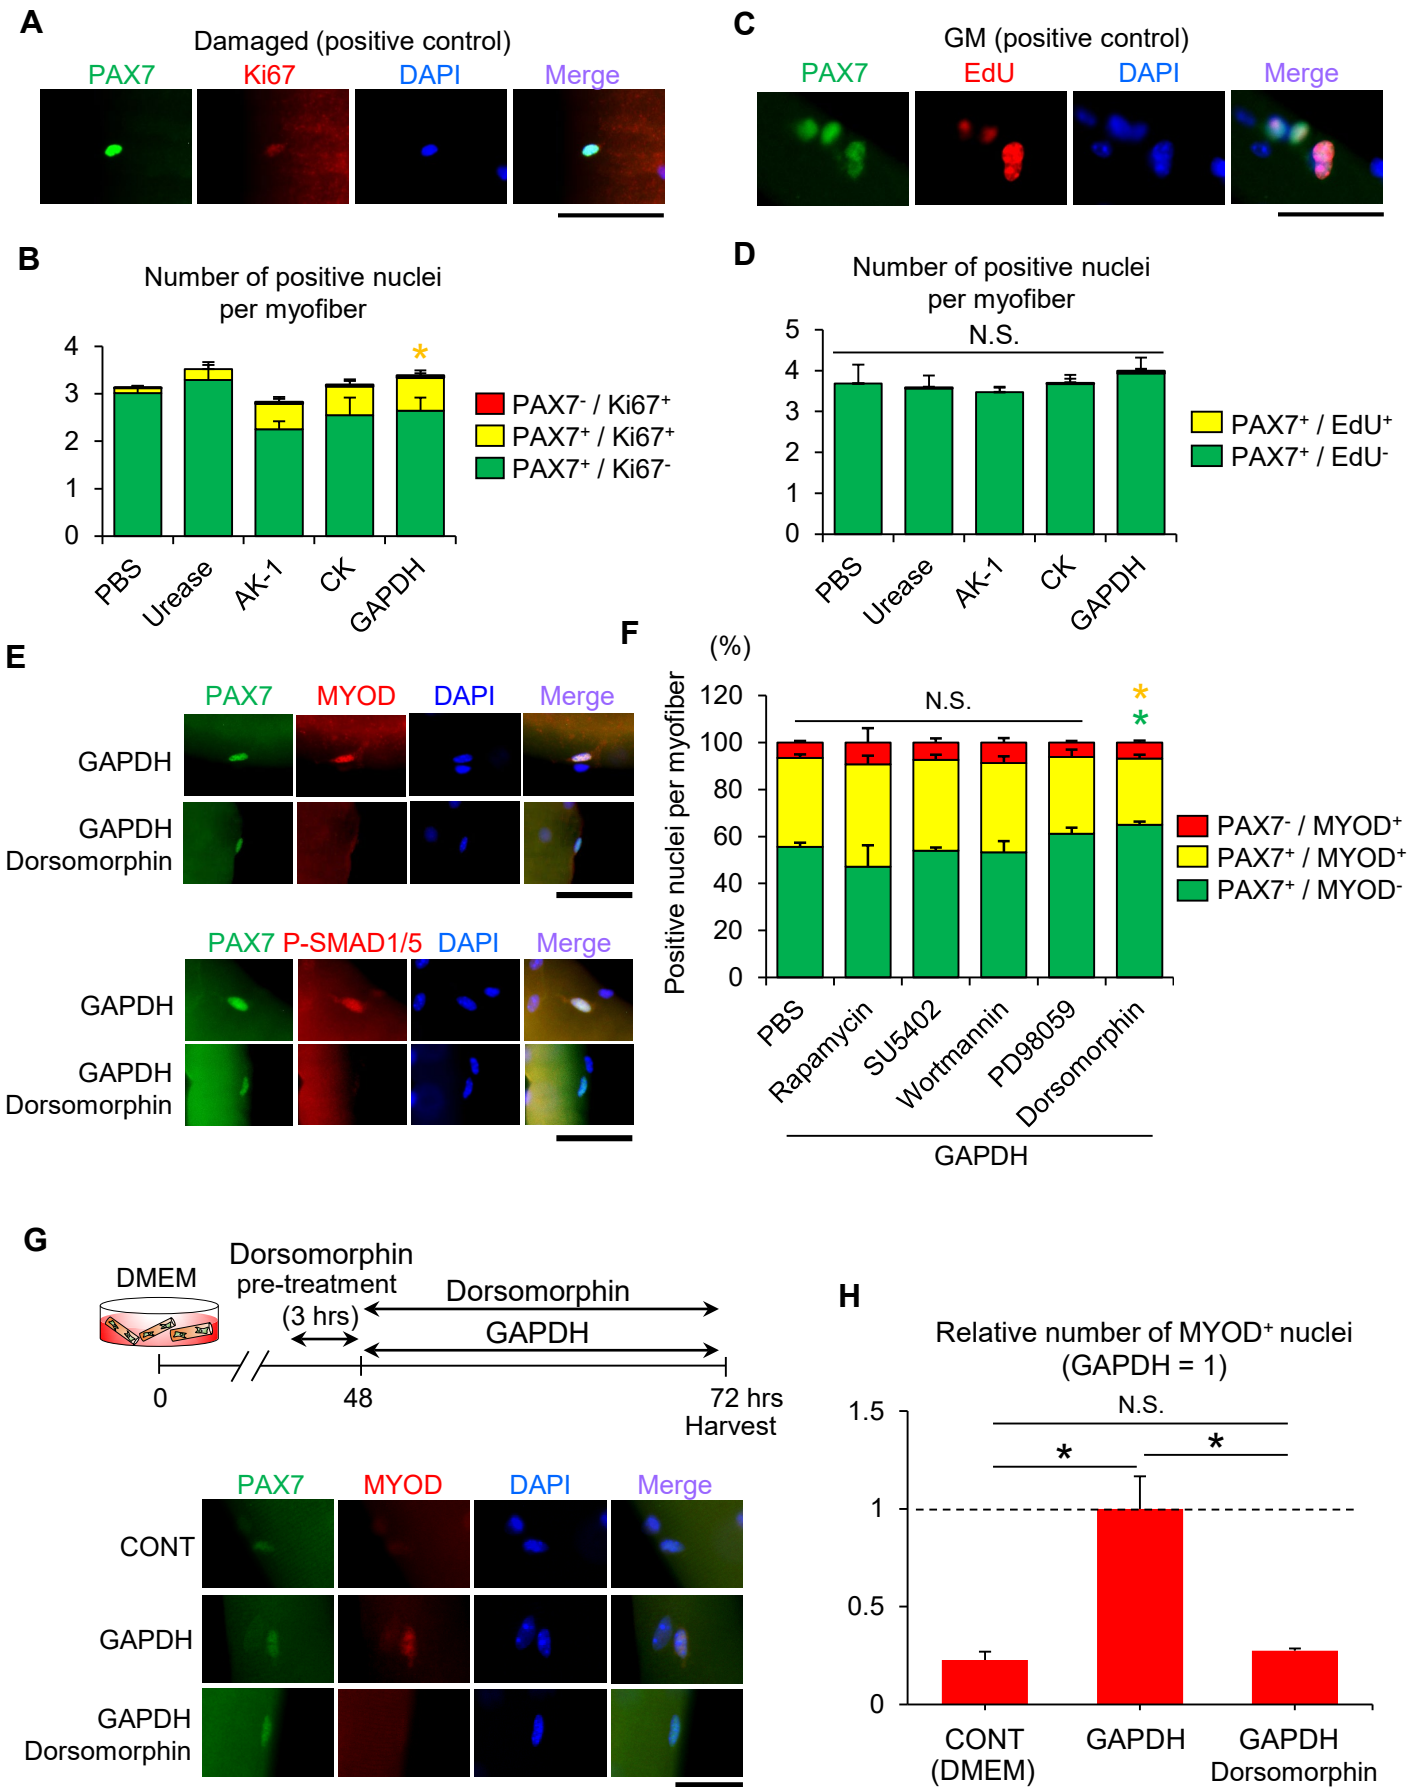

## Figure S2. Effects of DMDFs on satellite cells

To examine whether DMDFs stimulate induction of entry into the cell-cycle, satellite cells associated with individual myofibers were freshly isolated from EDL muscles and treated with recombinant metabolic enzyme proteins in DMEM for 72 hours. PBS and urease were used as negative control and a non-muscle enzymatic control, respectively.

**(A-B)** Immunostaining of satellite cells associated with myofibers for PAX7 and Ki67 **(A)**(quantified in **B**). Damaged myofibers (Damaged) were used as a positive control. Asterisk (\*) indicates differences compared with urease control. Values are means  $\pm$  SE (n=4 mice in each condition). \*P < 0.05. Scale bar, 50  $\mu$ m.

**(C-D)** Immunostaining of satellite cells associated with individual myofibers for PAX7 and EdU **(C)**(quantified in **D**). Myofibers cultured in GM were used as a positive control. Values are means  $\pm$  SE (n=4 mice in each condition). Scale bars, 50  $\mu$ m.

**(E-F)** Satellite cells associated with myofibers were treated with chemical compounds in the presence of GAPDH in DMEM for 72 hours. **(E)** Immunostaining for PAX7 and MYOD (quantified in **F**) or Pax7 and p-SMAD1/5 (BMP signaling downstream targets) was performed. Values are means  $\pm$  SE (n=3-5 mice, >15 individual myofibers per mouse were counted). Asterisk (\*) indicate differences compared with PBS control. \*P < 0.05. Scale bars, 50  $\mu$ m.

**(G-H)** Satellite cells associated with myofibers were treated with Dorsomorphin in the presence of GAPDH in DMEM for 24 hours followed by pre-treatment with Dorsomorphin for 3 hours. **(G)** Immunostaining for PAX7 and MYOD (quantified in **H**). Values are means  $\pm$  SE (n=3 mice, 10 individual myofibers per mouse were counted). \*P < 0.05. Scale bars, 25  $\mu$ m.

1 **Supplemental Information**

2 **Supplemental Experimental Procedures**

3 **Muscle damage model**

4 To induce muscle injury, 30  $\mu$ L of 1.2 % BaCl<sub>2</sub> was injected intramuscularly into the TA muscle  
5 in both the right and left legs of anesthetized mice using a 29G 1/2 insulin syringe at 24 hours  
6 following the administration of recombinant proteins into the TA muscle. Regenerating  
7 muscles were collected further 24 or 48 hours after BaCl<sub>2</sub> injection. The cryosections were  
8 frozen by 2-methylbutane chilled in liquid nitrogen immediately after dissection and stored at  
9  $-80^{\circ}\text{C}$  until cryosectioning. Transverse muscle sections were obtained using a cryostat. The  
10 dose of GAPDH recombinant protein for *in vivo* experiments was 3.6 U per TA muscle  
11 (approximately 50 mg). EdU was intraperitoneally injected to mice 24 hours before sacrifice.

12

13 **Proteome analysis**

14 Proteins were fractionated in 4-20% gradient SDS polyacrylamide gel (Cosmo-Bio, Japan),  
15 and protein bands were detected using GelCode Blue Stain Reagent (Thermo Fischer  
16 Scientific, Waltham, MA). The protein bands ranging from 10 to 50 kDa were recovered from  
17 SDS-PAGE gel. The protein in gel was treated by trypsin and eluted from the gel following to  
18 the manufacture's manual (Bruker Daltonics, Germany). In brief, the sliced gel was destained  
19 with destaining solution (25 mM ammonium bicarbonate (ABC), 50% acetonitrile (ACN)),  
20 completely dehydrated with 100% ACN, and then treated with the reduction buffer (10 mM  
21 dithiothreitol (DTT), 25 mM ABC) at  $56^{\circ}\text{C}$  for 45 min. After removed the reduction buffer and  
22 washed with 25 mM ABC, the gel was treated with alkylating solution (55 mM iodoacetamide,  
23 25 mM ABC) at room temperature for 30 min. After removed the alkylating buffer and washed  
24 with 25 mM ABC, the gel was completely dehydrated with acetonitrile again. The gel was

25 soaked with 20 ng/μl Trypsin Gold (Promega, Fitchburg, WI), and incubated at 37°C over  
26 night. The gel was mixed with the elution buffer (50% acetonitrile, 5% trifluoroacetate (TFA))  
27 and sonicated for 3 min, vortexed for 30 min. The elution containing trypsin-digested peptides  
28 was recovered, and then reduced volume to less than 10 μl by evaporator. The peptide  
29 sample was fractionated with L-column 2 (CERI, Japan) by using the combination with EASY-  
30 nLCII (Thermo Fischer Scientific, Waltham, MA) and PROTEINER fcll (Bruker Daltonics,  
31 Germany) following to the manufacture's manual (Bruker Daltonics, Germany). The  
32 fractionated sample was mixed with same volume of 0.7 mg/ml α-cyano-4-hydroxycinnamic  
33 acid (HCCA) (Bruker Daltonics, Germany) as a matrix. HCCA-mixed sample was analyzed  
34 to obtain m/z peak data by UltraflexIII matrix assisted laser desorption / ionization–time of  
35 flight mass spectrometry (MALDI-TOF/MS) with the equipped software (flexcontrol (ver. 3.3)  
36 and flexanalysis (ver. 3.3)) (Bruker Daltonics, Germany). The information of m/z signal data  
37 were analyzed by biotools (ver. 3.2) (Bruker Daltonics, Germany) and matrix server (Matrix  
38 Science, Boston, MA) by using public database (Swiss-Prot).

39

#### 40 **Recombinant proteins**

41 Recombinant proteins were purchased as follows: adenylate kinase-1 (AK-1, Novus  
42 Biologicals, CO), creatine kinase-MM (CK, Oriental Yeast, Tokyo, Japan), Glyceraldehyde-3-  
43 phosphate dehydrogenase (GAPDH, Abcam, Cambridge, UK), phosphoglycerate mutase-2  
44 (PGAM-2, Oriental Yeast, Tokyo, Japan) and triose phosphate isomerase (TPI, Abcam,  
45 Cambridge, UK). These recombinant proteins were added in DMEM in a floating culture  
46 condition.

47

#### 48 **Immunofluorescence**

49 For immunocytochemistry, satellite cells associated with myofibers were fixed with 2%  
50 paraformaldehyde, blocked/permeabilized with PBS containing 0.3% Triton X100 and 5%  
51 goat serum for 20 minutes at room temperature, and incubated with primary antibodies at  
52 4°C overnight as described previously. For immunohistochemistry, frozen transverse  
53 sections of TA muscle were fixed with 4% paraformaldehyde, blocked/permeabilized  
54 containing 0.3% Triton X100 in PBS for 20-30 minutes at room temperature, and incubated  
55 with primary antibodies at 4°C overnight. All immunostaining samples were visualized using  
56 appropriate species-specific Alexa Fluor 488 and/or 546 fluorescence-conjugated secondary  
57 antibodies (Thermo Fisher Scientific). Stained samples were viewed on an Olympus IX83  
58 (Olympus, Tokyo, Japan) microscope. Digital images were acquired with a DP80 camera and  
59 quantified using cellSens software (Olympus). Images were optimized globally and  
60 assembled into figures using Fiji.

61 Antibodies were obtained from the following sources: Mouse anti-PAX7 antibody (PAX7,  
62 sc-81648) (Santa Cruz Biotechnology, Inc., Santa Cruz, CA) and rabbit anti-MYOD antibody  
63 (sc-760) (Santa Cruz Biotechnology); rat anti-Ki67 antibody (TEC-3, M7249); Rat anti-GFP  
64 antibody (NACALAI TESQUE, Kyoto, Japan) ; Rabbit anti-P-SMAD1/5 antibody (Cell  
65 Signaling Technology); Rat anti-CD31 (Biolegend, CA); Rat anti-CD45 (Biolegend, CA);  
66 Alexa Fluor-conjugated secondary antibodies (Thermo Fisher Scientific).

67

### 68 **Quantitative reverse transcription-PCR (Q-PCR)**

69 Total RNA was extracted from TA muscle with ISOGEN II (NipponGene, Tokyo, Japan).  
70 cDNAs were prepared with a ReverTraAce kit (Toyobo, Tokyo, Japan). Q-PCR was  
71 performed with a THUNDERBIRD Probe qPCR Mix and a CFX96 real time PCR detection  
72 system (Bio Rad, Tokyo, Japan) according to the manufacturer's instructions. Primer

73 sequences were listed as follows: Pax7 (F5'-GTGCCCTCAGTGAGTTCGATTAGC-3' and  
74 R5'-CCACATCTGAGCCCTCATCCA-3'); Myf5 (F5'- TGAGGGAACAGGTGGAGAAC-3' and  
75 R5'- AGCTGGACACGGAGCTTTTA-3'); MyoD (F5'- AGCACTACAGTGGCGACTCA-3' and  
76 R5'- GCTCCACTATGCTGGACAGG-3'); Myogenin (F5'- CTACAGGCCTTGCTCAGCTC-3'  
77 and R5'- AGATTGTGGCGTCTGTAGG-3'); TATA box binding protein as a normalizer (F5'-  
78 CAGATGTGCGTCAGGCGTTC-3' and R5'- TAGTGATGCTGGGCACTGCG-3').  
79
